# Supplementary material for: Alcohol Sensor Based on Surface Plasmon Resonance of ZnO Nanoflowers/Au Structure
Source: MDPI journal article supplement (doi:10.3390/ma15010189), 2021-12-27
Supplement: s1 [file s1]

Supporting Information

# Alcohol Sensor Based on Surface Plasmon Resonance of ZnO Nanoflowers/Au Structure

Haowen Xu <sup>1</sup>, Yutong Song <sup>1</sup>, Panpan Zhu <sup>1</sup>, Wanli Zhao <sup>2</sup>, Tongyu Liu <sup>2</sup>, Qi Wang <sup>1,\*</sup> and Tianming Zhao <sup>1,\*</sup>

<sup>1</sup> College of Sciences, Northeastern University, Shenyang 110819, China; xuhaowen@stumail.neu.edu.cn (H.X.); 2000172@stu.neu.edu.cn (Y.S.); zhupanpan2004@163.com (P.Z.);

<sup>2</sup> Science and Technology on Electro-Optical Information Security Control Laboratory, Tianjin 300308, China; wanlizhao@163.com (W.Z.); liu\_tongyu@163.com (T.L.);

\* Correspondence: wangqi@mail.neu.edu.cn (Q.W.); zhaotm@stumail.neu.edu.cn (T.Z.)

NUMBER OF PAGES: S2

NUMBER OF FIGURES: S2

NUMBER OF TABLES: S3

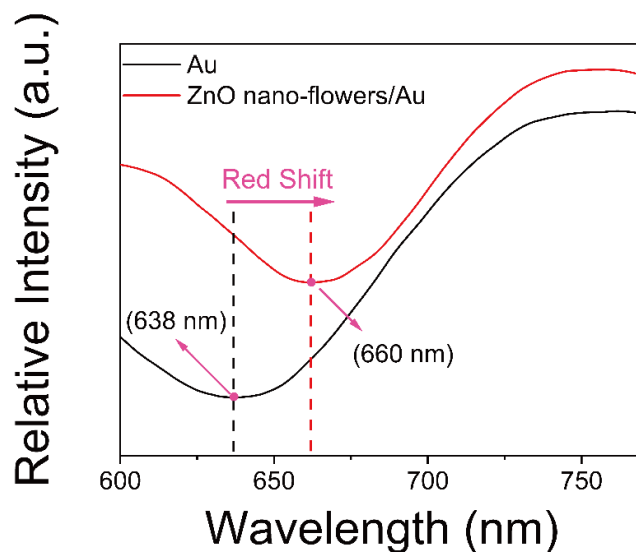

**Figure S1.** SPR signal of water (0 vol%) by Au film and ZnO nanoflowers/Au structure, respectively.

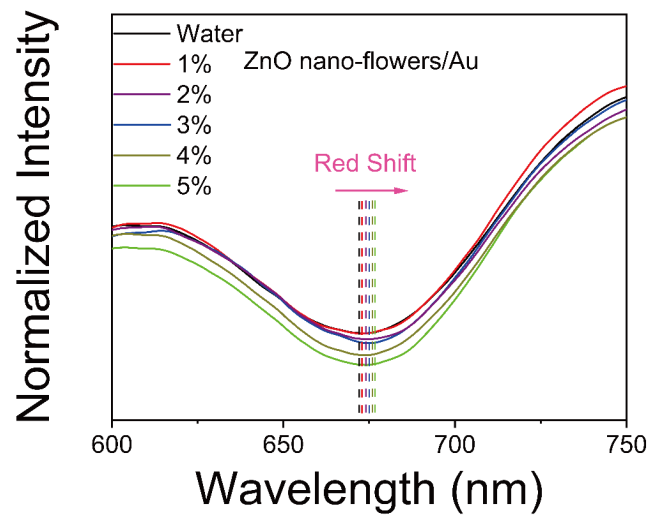

Figure S2. The LOD of the ZnO nanoflowers/Au structure.

Table S1. Comparison of measurement results between refraction and various concentrations of alcohol.

| Concentrations of Alcohol (VOL%) | Reflective Index (RI) |
|----------------------------------|-----------------------|
| 0                                | 1.332                 |
| 5                                | 1.335                 |
| 15                               | 1.3396                |
| 25                               | 1.3466                |
| 35                               | 1.3521                |
| 45                               | 1.357                 |
| 55                               | 1.3605                |
| 65                               | 1.3625                |
| 75                               | 1.3662                |
| 85                               | 1.3705                |
| 95                               | 1.3721                |

Table S2. Comparison of measurement results between refraction and various concentrations of formaldehyde.

| Concentrations of formaldehyde (VOL%) | Reflective Index (RI) |
|---------------------------------------|-----------------------|
| 10                                    | 1.3440                |
| 15                                    | 1.3496                |
| 20                                    | 1.3553                |
| 25                                    | 1.3613                |
| 30                                    | 1.366                 |

Table S3. Comparison of measurement results between refraction and various concentrations of formamide.

| Concentrations of formamide (VOL%) | Reflective Index (RI) |
|------------------------------------|-----------------------|
| 10                                 | 1.3457                |
| 20                                 | 1.3581                |
| 30                                 | 1.370                 |
| 40                                 | 1.3821                |
| 50                                 | 1.3937                |
